# Supplementary material for: A thermo-sensitive, injectable and biodegradable in situ hydrogel as a potential formulation for uveitis treatment
Source: Royal Society of Chemistry journal article supplement (doi:10.1039/c9tb00939f), 2019-01-01
Supplement: c9tb00939f1.pdf [file c9tb00939f1.pdf]

## Supporting Information

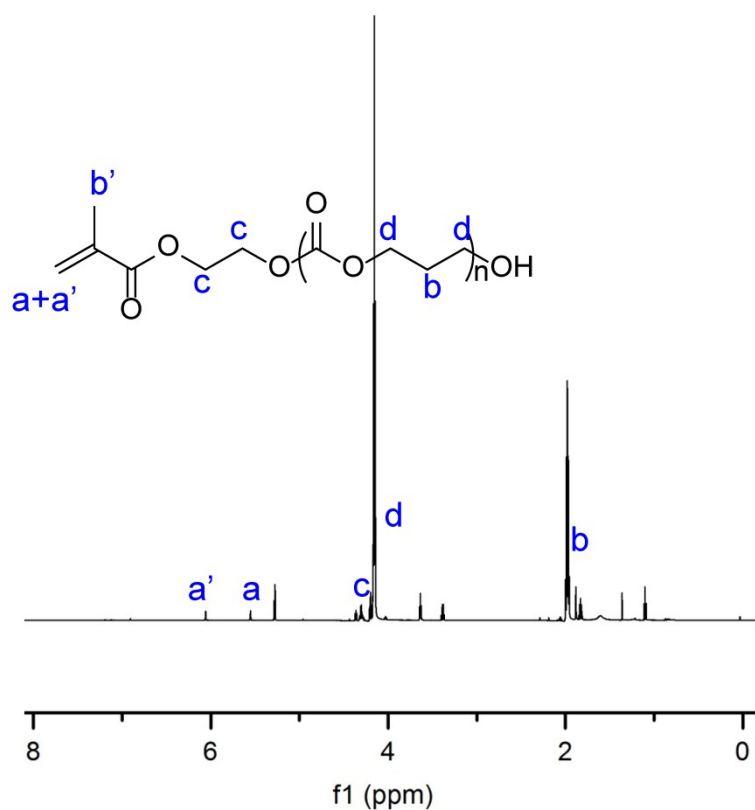

Figure S1.  $^1\text{H}$  NMR spectra of HEMA-g-PTMC macromonomer in  $\text{CD}_2\text{Cl}_2$ .

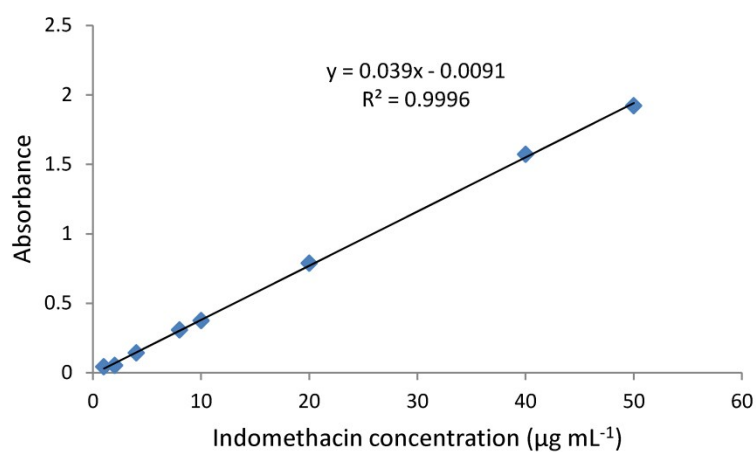

Figure S2. Standard curve of poly(NIPAAm-co-MAA-co-HTI) DMSO solution confirmed by UV-visible spectrophotometer.

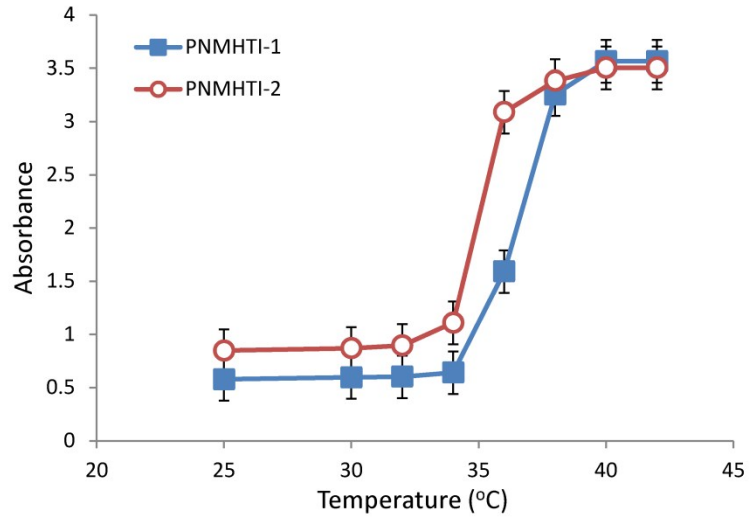

Figure S3. LCST determination by measurement of poly(NIPAAm-*co*-MAA-*co*-HTI) copolymer solutions optical absorption.
